# Supplementary material for: Dilute-and-Shoot HPLC-UV Method for Determination of Urinary Creatinine as a Normalization Tool in Mycotoxin Biomonitoring in Pigs
Source: PubMed Central journal article supplement (PMC7288144; doi:10.3390/molecules25102445), 2020-05-24
Supplement: molecules-25-02445-s001.pdf [file molecules-25-02445-s001.pdf]

# Supplementary Material

**Table S1.** Human biomonitoring studies, in which the ratio between mycotoxin concentration and creatinine content of urine was calculated.

| Biomarker   | Mean concentration of positive samples [ng mL <sup>-1</sup> ] | Creatinine adjusted concentration [ng mg <sup>-1</sup> creatinine] | Mean creatinine concentration [mg mL <sup>-1</sup> ] | Creatinine analysis                     | Matrix effect | Reference |           |                       |   |      |
|-------------|---------------------------------------------------------------|--------------------------------------------------------------------|------------------------------------------------------|-----------------------------------------|---------------|-----------|-----------|-----------------------|---|------|
| CIT         | 0.03 ± 0.02                                                   | 0.34 ± 0.36                                                        | 1.3 ± 0.9                                            | modified Jaffe method                   | -             | [30]      |           |                       |   |      |
| DH-CIT      | 0.10 ± 0.10                                                   | 1.02 ± 1.10                                                        |                                                      |                                         |               |           |           |                       |   |      |
| OTA         | 0.37 ± 0.28                                                   | 0.16 ± 0.11                                                        | 1.7 ± 0.4                                            | Jaffe's reaction                        | +             | [33]      |           |                       |   |      |
| OTα         | 9.03 ± 5.25                                                   | 4.30 ± 1.75                                                        |                                                      |                                         |               |           |           |                       |   |      |
| ZEN         | 8.45 ± 5.87                                                   | 7.00 ± 5.37                                                        |                                                      |                                         |               |           |           |                       |   |      |
| β-ZEL       | 13.30 ± 9.16                                                  | 9.45 ± 8.25                                                        |                                                      |                                         |               |           |           |                       |   |      |
| DON         | 43.70 ± 28.39                                                 | 29.62 ± 26.40                                                      |                                                      |                                         |               |           |           |                       |   |      |
| CIT         | 6.80                                                          | 4.50                                                               |                                                      |                                         |               |           |           |                       |   |      |
| ZEN         | 0.529 ± 1.60                                                  | 0.204 ± 0.456                                                      | 3.4 ± 2.4                                            | Jaffe's reaction                        | -             | [32]      |           |                       |   |      |
| FB1         | 1.52 ± 2.17                                                   | 0.185 ± 0.236                                                      |                                                      |                                         |               |           |           |                       |   |      |
| α-ZEL       | 0.614 ± 1.91                                                  | 0.247 ± 0.590                                                      |                                                      |                                         |               |           |           |                       |   |      |
| DON         | 11.3 ± 27.1                                                   | 4.94 ± 7.60                                                        |                                                      |                                         |               |           |           |                       |   |      |
| β-ZEL       | 0.702 ± 2.95                                                  | 0.244 ± 0.820                                                      |                                                      |                                         |               |           |           |                       |   |      |
| OTA         | 0.041 ± 0.086                                                 | 0.024 ± 0.058                                                      |                                                      |                                         |               |           |           |                       |   |      |
| DON         | 5.38 ± 12.3                                                   | 7.02 ± 24.4                                                        | 0.8 ± 0.3                                            | Test <sup>TM</sup> Creatinine Enzymatic | -             | [41]      |           |                       |   |      |
| DOM-1       | 2.32 ± 2.68                                                   | 1.56 ± 1.26                                                        |                                                      |                                         |               |           |           |                       |   |      |
| ZEN         | 0.09 ± 0.07                                                   | 0.14 ± 0.13                                                        |                                                      |                                         |               |           |           |                       |   |      |
| α-ZEL       | 0.13 ± 0.26                                                   | 0.19 ± 0.26                                                        |                                                      |                                         |               |           |           |                       |   |      |
| β-ZEL       | 0.10 ± 0.19                                                   | 0.13 ± 0.18                                                        |                                                      |                                         |               |           |           |                       |   |      |
| FB1         | 0.07 ± 0.06                                                   | 0.13 ± 0.26                                                        |                                                      |                                         |               |           |           |                       |   |      |
| FB2         | 0.06 ± 0.12                                                   | 0.16 ± 0.51                                                        |                                                      |                                         |               |           |           |                       |   |      |
| OTA         | 0.90 ± 0.50                                                   | 1.43 ± 1.74                                                        |                                                      |                                         |               |           |           |                       |   |      |
| NIV         | 0.13 ± 0.14                                                   | 0.12 ± 0.07                                                        |                                                      |                                         |               |           |           |                       |   |      |
| AFM1        |                                                               |                                                                    |                                                      |                                         |               |           |           |                       |   |      |
| FB1         | 0.05                                                          | 0.04                                                               | 1.2 ± 0.3                                            | LC-MS/MS                                | -             | [39]      |           |                       |   |      |
| OTA         | 0.63                                                          | 0.33                                                               |                                                      |                                         |               |           |           |                       |   |      |
| DON-15-GlcA | 0.08                                                          | 0.07                                                               |                                                      |                                         |               |           |           |                       |   |      |
| DON-3-GlcA  | 5.49                                                          | 5.72                                                               |                                                      |                                         |               |           |           |                       |   |      |
| ZEN         | 0.22                                                          | 0.21                                                               |                                                      |                                         |               |           |           |                       |   |      |
| ZEN-14-GlcA | 0.81                                                          | 0.765                                                              |                                                      |                                         |               |           |           |                       |   |      |
| NIV         | 2.61                                                          | 2.87                                                               |                                                      |                                         |               |           |           |                       |   |      |
| OTA         | 0.21 ± 0.31                                                   | 0.17 ± 0.22                                                        |                                                      |                                         |               |           | 1.3 ± 0.1 | modified Jaffe method | - | [34] |
| OTα         | 1.33 ± 2.63                                                   | 1.01 ± 1.94                                                        |                                                      |                                         |               |           |           |                       |   |      |
| DON         | 18.8 ± 3.5                                                    | 17.5 ± 2.7                                                         |                                                      |                                         |               |           | 1.1       | Jaffe's reaction      | - | [35] |
| DON-3-GlcA  | 4.3                                                           | 2.4                                                                | 1.5 ± 0.4                                            | LC-MS/MS                                | -             | [40]      |           |                       |   |      |
| DON-15-GlcA | 8.1                                                           | 4.8                                                                |                                                      |                                         |               |           |           |                       |   |      |
| AFM1        | 0.33                                                          | 0.31                                                               |                                                      |                                         |               |           |           |                       |   |      |

|               |                 |                 |               |          |   |      |
|---------------|-----------------|-----------------|---------------|----------|---|------|
| ZEN           | $0.10 \pm 0.05$ | $0.09 \pm 0.05$ |               | modified |   |      |
| $\alpha$ -ZEL | $0.16 \pm 0.07$ | $0.16 \pm 0.13$ | $1.4 \pm 0.9$ | Jaffe    | - | [36] |
| $\beta$ -ZEL  | $0.05 \pm 0.04$ | $0.04 \pm 0.05$ |               | method   |   |      |
